# Supplementary material for: Stroke Outcome Related to Initial Volume Status and Diuretic Use
Source: PubMed Central journal article supplement — J Am Heart Assoc. 2022 Dec 14;11(24):e026903. doi: 10.1161/JAHA.122.026903 (PMC9798788; doi:10.1161/jaha.122.026903), 2022-12-14
Supplement: JAH3-11-e026903-s001.pdf [file JAH3-11-e026903-s001.pdf]

# **SUPPLEMENTAL MATERIAL**

**Table S1. Baseline Characteristics using VCS-30: volume contracted state defined as BUN/Creatinine ratio>30.**

| Variable                                     | Volume contracted state (VCS-30) (n=462) | No VCS-30 (n=5509) | p-value |
|----------------------------------------------|------------------------------------------|--------------------|---------|
| Age                                          | 74 ± 11                                  | 69 ± 12            | <0.01   |
| Sex, female                                  | 338 (73%)                                | 2381 (43%)         | <0.01   |
| Race/ethnicity*                              |                                          |                    | <0.01*  |
| - Black (3%)                                 | 4 (1%)                                   | 186 (3%)           |         |
| - Asian (6%)                                 | 22 (5%)                                  | 420 (8%)           |         |
| - White (76%)                                | 391 (85%)                                | 4635 (84%)         |         |
| - Other (15%)                                | 45 (10%)                                 | 268 (5%)           |         |
| Country                                      |                                          |                    |         |
| - Europe/Australia/South Africa/Israel (62%) | 285 (62%)                                | 3565 (65%)         |         |
| - North America (32%)                        | 151 (33%)                                | 1483 (27%)         |         |
| - South America (1%)                         | 9 (2%)                                   | 87 (2%)            |         |
| - East Asia (5%)                             | 17 (4%)                                  | 374 (7%)           |         |
| Hypertension                                 | 337 (73%)                                | 3917 (71%)         | 0.40    |
| Diabetes mellitus                            | 126 (27%)                                | 1174 (21%)         | <0.01   |
| Atrial fibrillation                          | 149 (32%)                                | 1355 (25%)         | <0.01   |
| Heart failure                                | 64 (14%)                                 | 441 (8%)           | <0.01   |
| Previous myocardial infarction               | 52 (11%)                                 | 677 (12%)          | 0.52    |
| Previous stroke                              | 70 (15%)                                 | 1054 (19%)         | 0.04    |
| Previous Transient Ischemic Attack           | 41 (9%)                                  | 453 (9%)           | 0.68    |
| THRIVE score                                 | 4 (3-5)                                  | 3 (2-5)            | <0.01   |
| Chronic kidney disease Stage                 |                                          |                    | <0.01   |
| - 0                                          | 144 (31%)                                | 1292 (23%)         |         |
| - 1                                          | 212 (46%)                                | 2718 (49%)         |         |
| - 2                                          | 67 (15%)                                 | 1063 (19%)         |         |
| - 3                                          | 36 (8%)                                  | 366 (7%)           |         |
| - 4                                          | 3 (1%)                                   | 65 (1%)            |         |
| - 5                                          | 0                                        | 5 (0.09%)          |         |
| Diuretics                                    |                                          |                    |         |
| - Potassium-sparing                          | 41 (9%)                                  | 479 (9%)           | 0.91    |
| - Non-Potassium-sparing                      | 210 (45%)                                | 2240 (41%)         | 0.05    |
| - Both                                       | 36 (8%)                                  | 427 (8%)           | 0.98    |
| - Neither                                    | 247 (53%)                                | 3201 (58%)         | 0.05    |
| - Any diuretic                               | 215 (47%)                                | 2292 (42%)         | 0.04    |
| Baseline Labs                                |                                          |                    |         |
| - Blood urea nitrogen (mg/dL)                | 30 ± 11                                  | 18 ± 7             | <0.01   |
| - Creatinine (mg/dL)                         | 0.85 ± 0.27                              | 0.97 ± 0.31        | <0.01   |
| - Sodium (mmol/L)                            | 139 ± 4                                  | 140 ± 4            | 0.21    |
| - Potassium (mmol/L)                         | 4.2 ± 0.6                                | 4.1 ± 0.5          | <0.012  |
| - Glucose (mg/dL)                            | 146 ± 62                                 | 136 ± 54           | <0.01   |
| - Hemoglobin (g/dL)                          | 13.1 ± 1.8                               | 13.8 ± 1.7         | <0.01   |
| Baseline Blood Pressure                      |                                          |                    |         |
| - systolic                                   | 151 ± 23                                 | 152 ± 24           | 0.40    |
| - diastolic                                  | 79 ± 15                                  | 82 ± 15            | <0.01   |
| Stroke Onset-to-Enrollment (hours)           | 3.8 ± 1.1                                | 4.0 ± 1.2          | 0.02    |
| Baseline NIHSS score                         | 14 (11-18)                               | 12 (8-16)          | <0.01   |
| Intravenous thrombolysis (rtPA)              | 181 (39%)                                | 2014 (37%)         | 0.28    |
| Calculated osmolality                        | 298 ± 9                                  | 293 ± 8            | <0.01   |

\*Race comparison is white versus non-white
